# Supplementary material for: Skin-like low-noise elastomeric organic photodiodes
Source: PubMed Central journal article supplement — Sci Adv. 2021 Dec 15;7(51):eabj6565. doi: 10.1126/sciadv.abj6565 (PMC8673773; doi:10.1126/sciadv.abj6565), 2021-12-15
Supplement: sciadv.abj6565_sm.pdf [file sciadv.abj6565_sm.pdf]

Supplementary Materials for  
**Skin-like low-noise elastomeric organic photodiodes**

Youngrak Park, Canek Fuentes-Hernandez\*, Kyungjin Kim, Wen-Fang Chou, Felipe A. Larrain,  
Samuel Graham, Olivier N. Pierron, Bernard Kippelen\*

\*Corresponding author. Email: c.fuentes@northeastern.edu (C.F.-H.); kippelen@gatech.edu (B.K.)

Published 15 December 2021, *Sci. Adv.* 7, eabj6565 (2021)  
DOI: 10.1126/sciadv.abj6565

**This PDF file includes:**

Figs. S1 to S5  
Tables S1 and S2

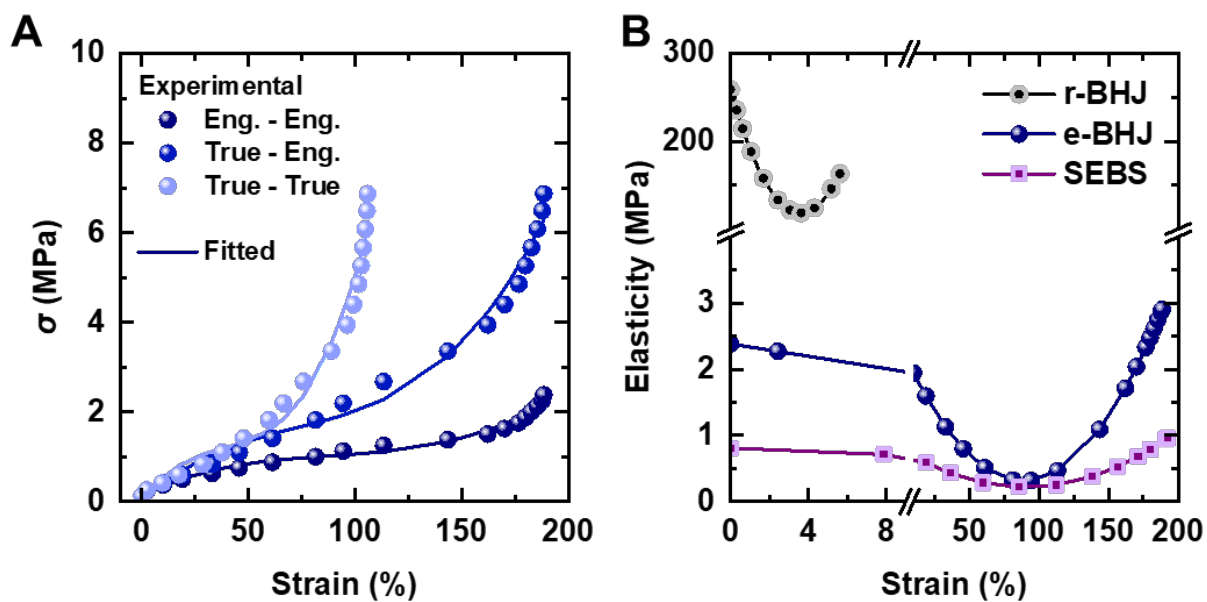

**Fig. S1.**

**Analysis of mechanical properties of freestanding films.** (A) Comparison of experimental and fitted stress curve of e-BHJ. (B) Elasticity vs. strain plot derived from the engineering stress-strain curve.

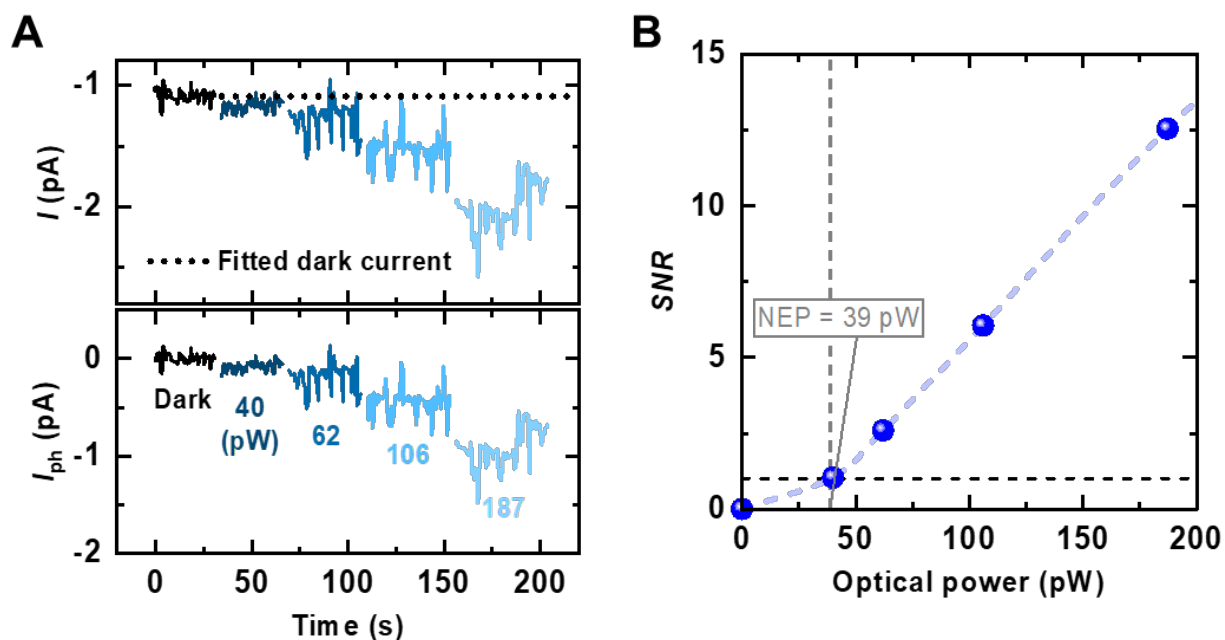

**Fig. S2.**

**Analysis of photodetector metrics for OPD with e-BHJ on a rigid substrate. (A)** Optical power dependence of transient current and photocurrent. **(B)** Optical power dependence of signal-to-noise ratio.

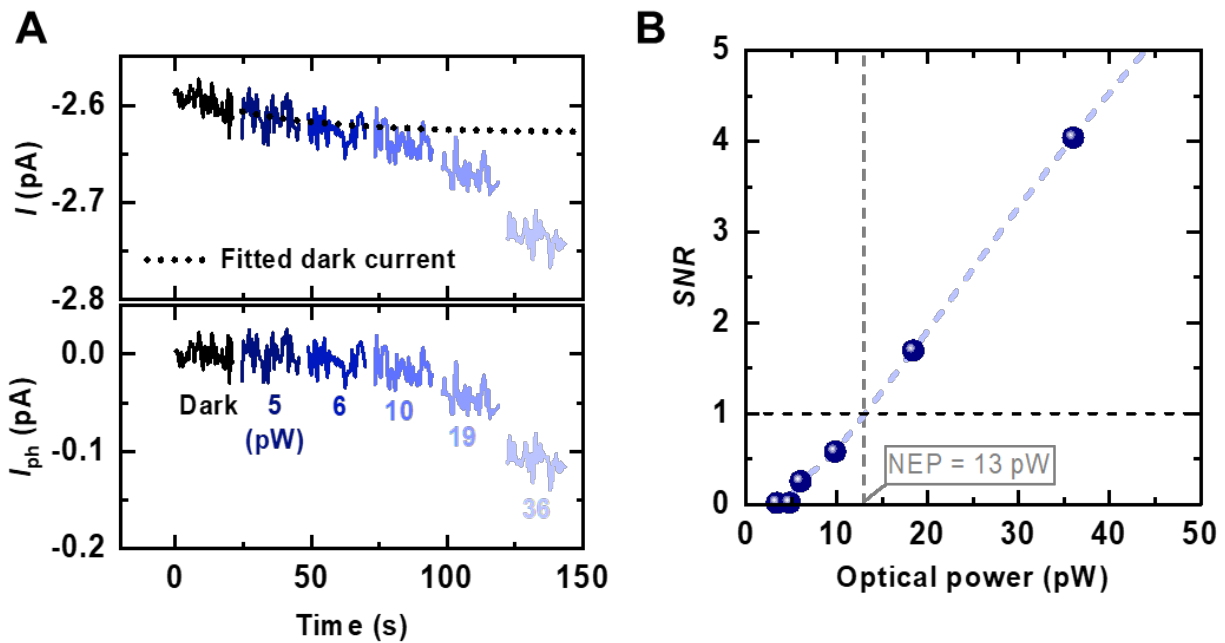

**Fig. S3.**

**Analysis of photodetector metrics for unstrained e-OPD.** (A) Optical power dependence of transient current and photocurrent. (B) Optical power dependence of signal-to-noise ratio.

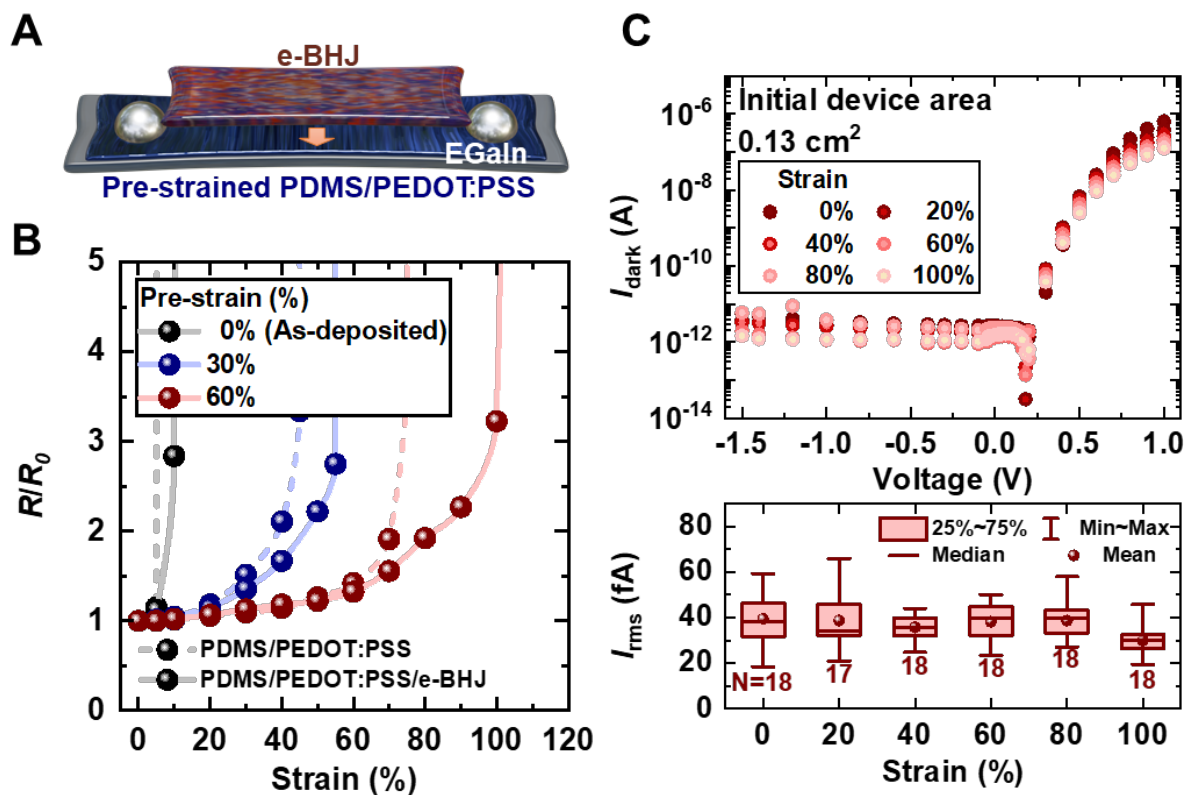

Fig. S4.

**Improved stretchability of e-OPD using 60% pre-strained PDMS/PEDOT:PSS.** (A) Structure of pre-strained PDMS/PEDOT:PSS electrode. (B) Normalized resistance vs. strain plot (bottom). (C) Dark current (top) and root-mean-squared noise box plot (bottom).

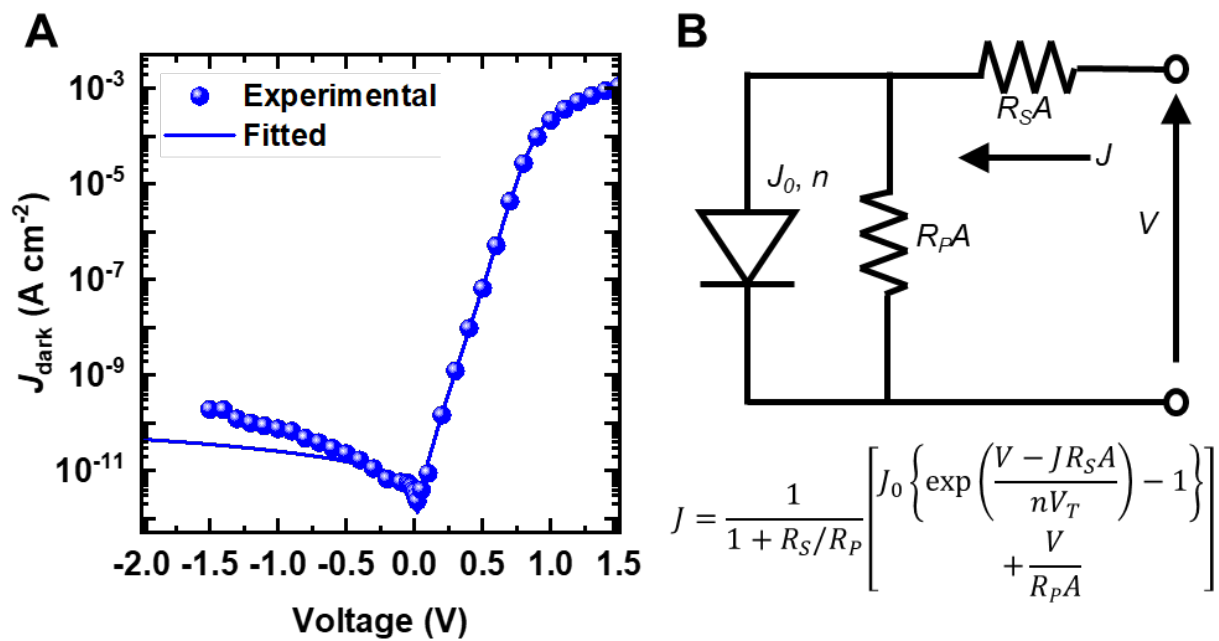

**Fig. S5.**

**Comparison of experimental and fitted dark current density using an equivalent circuit model for OPD with e-BHJ on a rigid substrate. (A)** Experimental and fitted dark current density. **(B)** Equivalent circuit (top), corresponding equation (bottom), and physical parameters listed in Table S2.

**Table S1.****Elasticity at different strains of freestanding films extracted from the engineering stress-strain plots.**

| <b>Freestanding films</b> | <b>Strain at break (%)</b> | <b>Elasticity at 0% (MPa)</b> | <b>Elasticity at 50% (MPa)</b> | <b>Elasticity at 100% (MPa)</b> | <b>Elasticity at 150% (MPa)</b> |
|---------------------------|----------------------------|-------------------------------|--------------------------------|---------------------------------|---------------------------------|
| r-BHJ                     | 6                          | 259                           | -                              | -                               | -                               |
| e-BHJ                     | 189                        | 2.4                           | 0.7                            | 0.3                             | 1.3                             |
| SEBS                      | 192                        | 0.8                           | 0.3                            | 0.2                             | 0.5                             |

**Table S2.****Physical parameters of OPD with e-BHJ on a rigid substrate derived from an equivalent circuit model.**

| <b>Reverse saturation current density, <math>J_0</math> (pA cm<sup>-2</sup>)</b> | <b>Ideality factor, <math>n</math></b> | <b>Series resistance, <math>R_S</math> (<math>\Omega</math>)</b> | <b>Shunt resistance, <math>R_P</math> (<math>\Omega</math>)</b> |
|----------------------------------------------------------------------------------|----------------------------------------|------------------------------------------------------------------|-----------------------------------------------------------------|
| 2.5                                                                              | 1.89                                   | $5 \times 10^3$                                                  | $5 \times 10^{11}$                                              |
